# Supplementary material
Source: PubMed Central journal article supplement (PMC6524525)
Supplement: NIHMS1013889-supplement-Suppl_Figure_1.pdf [file NIHMS1013889-supplement-Suppl_Figure_1.pdf]

## Supplementary Fig. S1

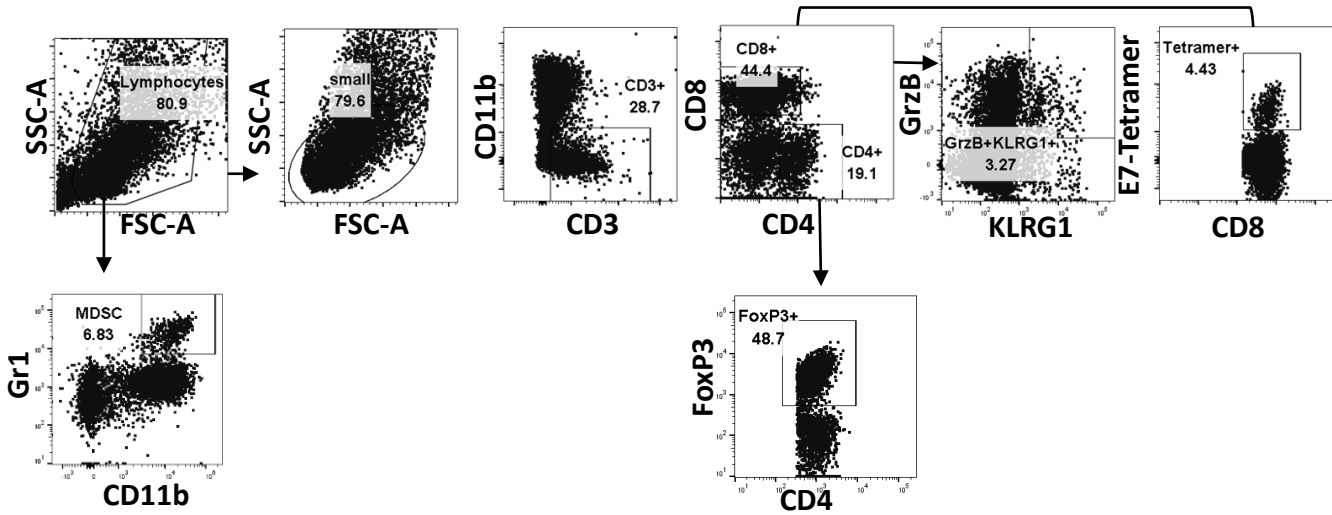

Supplementary Fig S1. **Gating strategy to analyze TILs after immunotherapy combinations.** TILs were stained with a 16-color panel of fluorescently labeled antibodies to detect the activated cytotoxic CD8<sup>+</sup> T cells (KLRG1<sup>+</sup>, GrzB<sup>+</sup>), E7-specific CD8<sup>+</sup> T cells, Tregs (CD4<sup>+</sup>, FoxP3<sup>+</sup>), and MDSCs (CD11b<sup>+</sup>, Gr1<sup>+</sup>).
