# Supplementary material
Source: PubMed Central journal article supplement (PMC6524525)
Supplement: NIHMS1013889-supplement-Suppl_Figure_2.pdf [file NIHMS1013889-supplement-Suppl_Figure_2.pdf]

## Supplementary Fig. S2

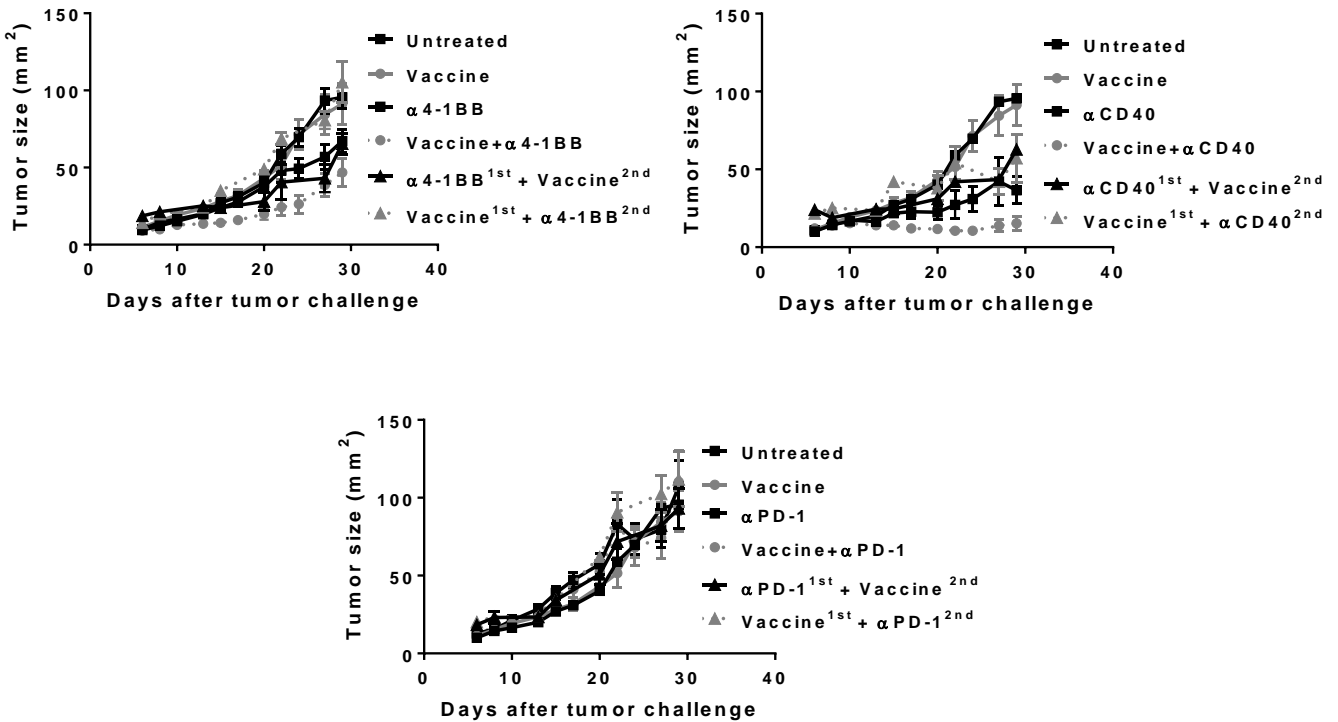

Supplementary Fig S2. **Sequential treatment of vaccine and immune checkpoint modulation.** Tumor-bearing mice were treated with vaccine at days 6 and 12 (1<sup>st</sup>) or 15 and 21 (2<sup>nd</sup>) and α4-1BB, or αCD40 or αPD-1 on days 6, 9, and 12 (1<sup>st</sup>) or on days 15, 18, and 21 (2<sup>nd</sup>). Concurrent treatment was given on days 6, 9, and 12. (n = 3 – 13)
