# Supplementary material
Source: PubMed Central journal article supplement (PMC6524525)
Supplement: NIHMS1013889-supplement-Suppl_Figure_3.pdf [file NIHMS1013889-supplement-Suppl_Figure_3.pdf]

### Supplementary Fig. S3

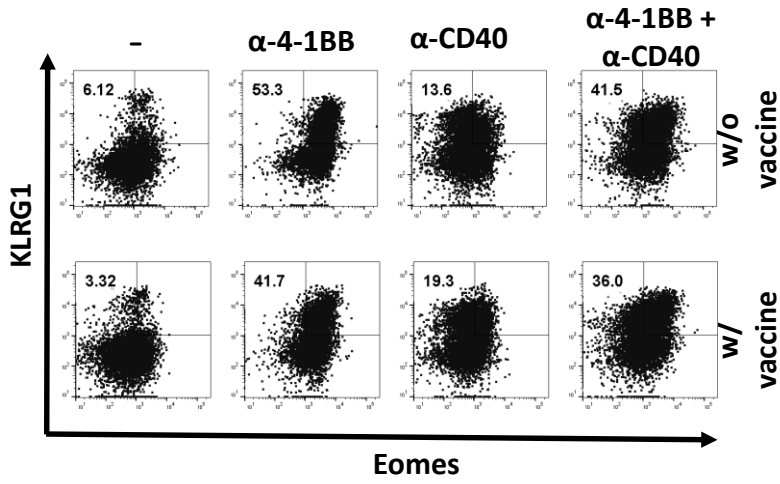

Supplementary Fig S3. **Therapeutic efficacy of immunotherapy combinations correlates with the presence of TcEO cells in the tumors.** TILs were analyzed to quantify TcEO cells (CD8+KLRG1+Eomes+) at day 15 after tumor induction. One representative plot showing the expression of Eomes and KLRG1 on CD8+ T cells (n = 2 – 4 mice/group).
