# Supplementary material
Source: PubMed Central journal article supplement (PMC6524525)
Supplement: NIHMS1013889-supplement-Suppl_Figure_6.pdf [file NIHMS1013889-supplement-Suppl_Figure_6.pdf]

## Supplementary Fig. S6

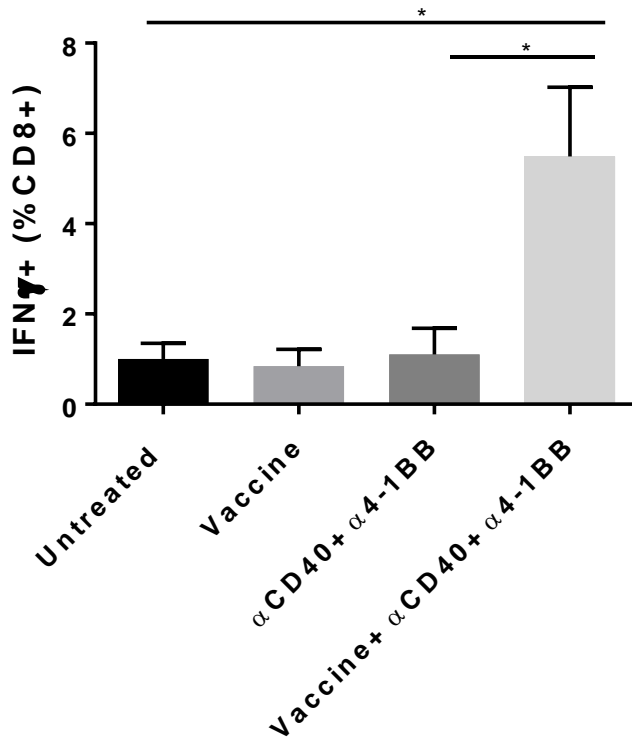

Supplementary Fig S6. **Induction of systemic antigen-specific CD8+ T cell responses after vaccine immunotherapy.** Splenocytes from mice either untreated or treated with the combination of  $\alpha$ 4-1BB and  $\alpha$ CD40 antibodies in the presence or absence of HPV peptide vaccine were harvested at day 15 after tumor challenge and cultured with the mixture of the four E6 and E7 peptides in the vaccine (0.2  $\mu$ g each) for 24 hrs to detect IFN- $\gamma$  producing CD8+ T cells by flow cytometry. Data is represented as mean  $\pm$  SEM (n = 4 – 6 mice/group). Results represent pooled data from two separate experiments.
